# Supplementary material for: Digital light processing 3D printing with thiol–acrylate vitrimers
Source: Royal Society of Chemistry journal article supplement (doi:10.1039/d0py01520b), 2020-12-14
Supplement: d0py01520b2.pdf [file d0py01520b2.pdf]

## Supporting Information

### Digital light processing 3D printing with thiol-acrylate vitrimers

Elisabeth Rossegger,<sup>a</sup> Rita Höller,<sup>a</sup> David Reisinger,<sup>a</sup> Jakob Strasser,<sup>a</sup> Mathias Fleisch,<sup>a</sup> Thomas Griesser<sup>b</sup>  
and Sandra Schlögl<sup>\*a</sup>

<sup>a</sup>Polymer Competence Center Leoben GmbH, Roseggerstrasse 12, A-8700 Leoben, Austria

e-mail: [sandra.schloegl@pccl.at](mailto:sandra.schloegl@pccl.at)

<sup>b</sup>Institute of Chemistry of Polymeric Materials, Montanuniversitaet Leoben, Otto Glöckel-Strasse 2, A-8700 Leoben, Austria

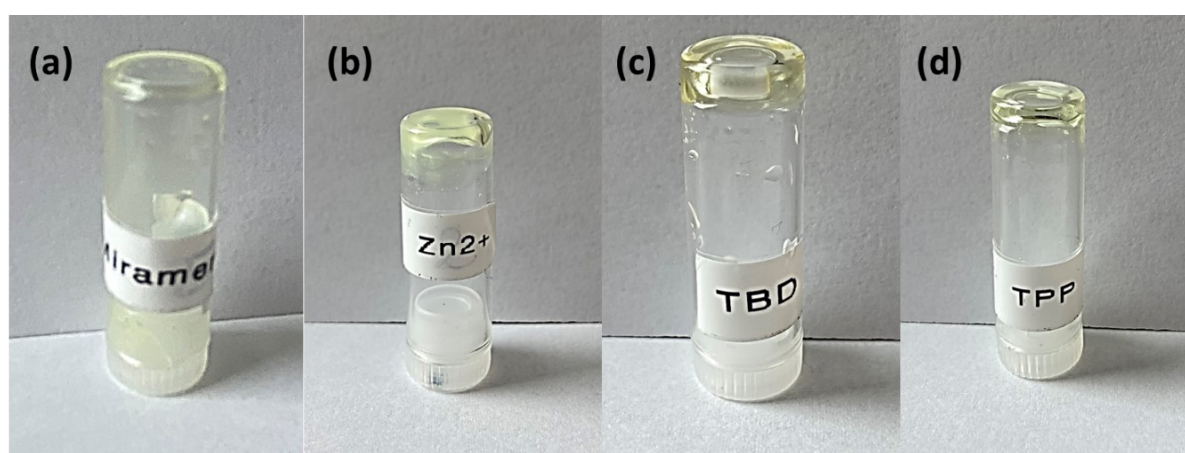

**Figure S1** - Monitoring the premature gelation of a thiol-acrylate formulation containing 50% 2-hydroxy-2-phenoxypropyl acrylate, 25 mol% glycerol 1,3-dicyclerolate diacrylate, 25 mol% trimethylolpropane tri(3-mercaptopropionate) and 2 wt% phenylbis(2,4,6-trimethylbenzoyl)phosphine oxide after adding a commonly used transesterification catalyst (5 mol% related to -OH groups) versus the behavior of ER-resin-1. Photographs show (a) ER-resin-1 and the thiol-acrylate resin directly after the addition of (b)  $\text{Zn}(\text{OAc})_2$ , (c) triazabicyclodecene and (d) triphenylphosphine.

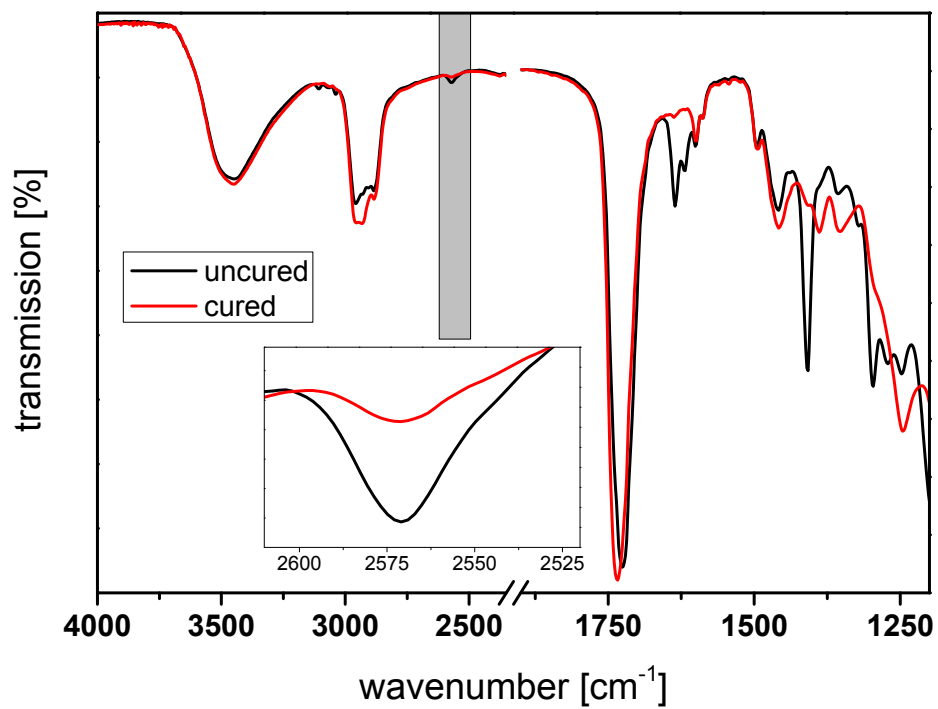

**Figure S2** - FTIR spectra of resin-ER-1 prior to and after photocuring with a light emitting diode lamp (zgood® wireless LED curing lamp) comprising a power density of 3.3 mW cm<sup>-2</sup> ( $\lambda$  = 420 - 450 nm).

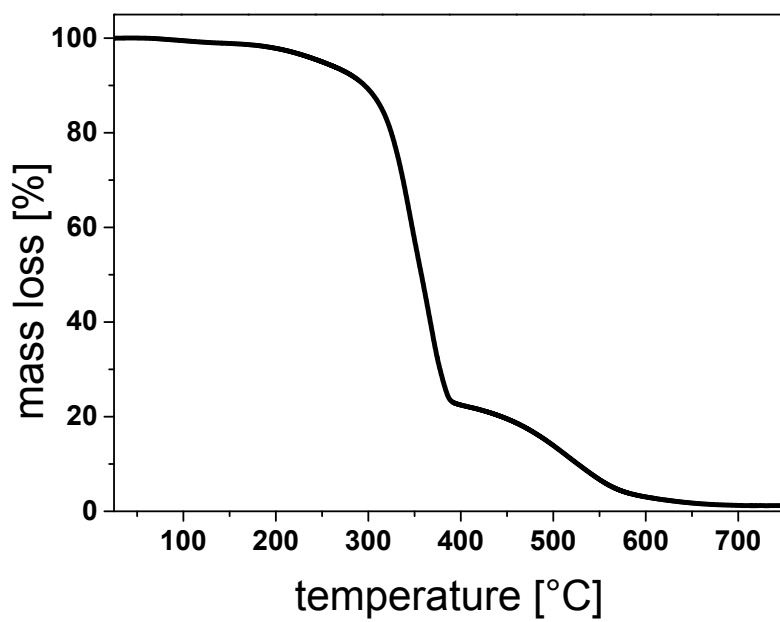

**Figure S3** - TGA curve of cured resin-ER-1.

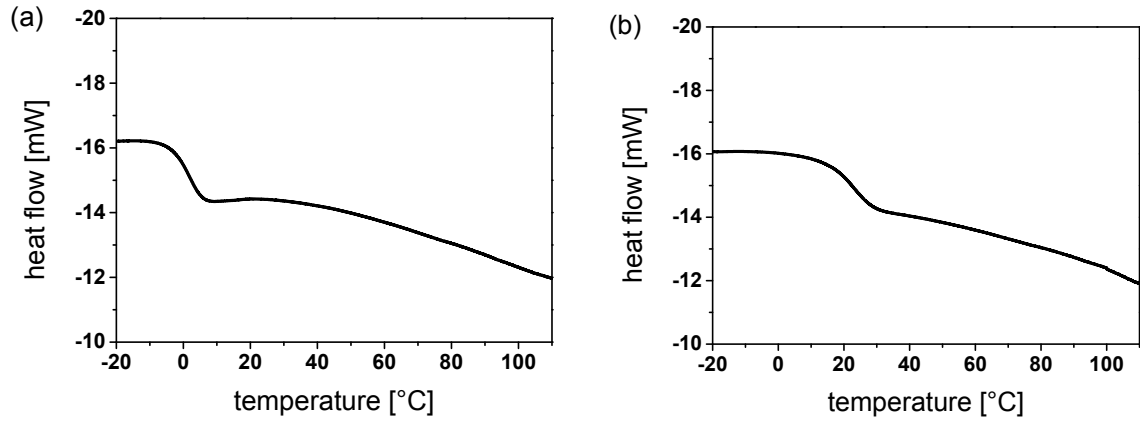

**Figure S4** - DSC curves of DLP printed test specimen from catalyzed resin-ER-1 (a) prior to and (b) after thermal treatment at 180 °C for 4 h.

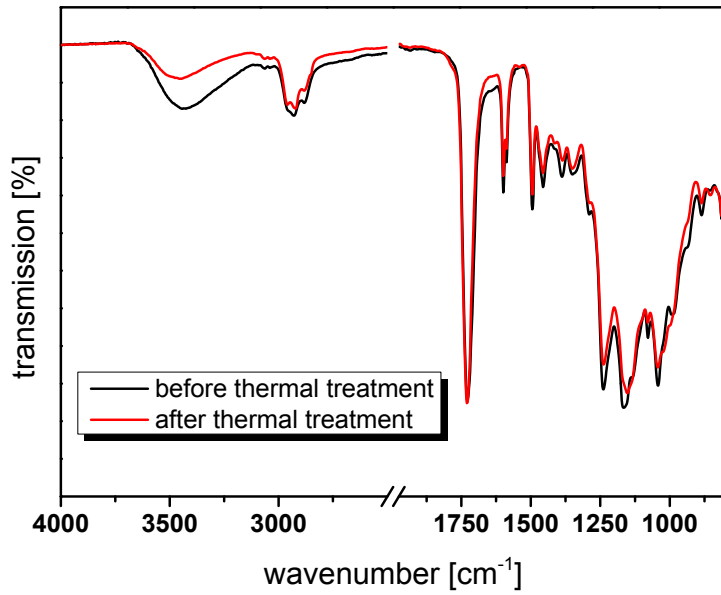

**Figure S5** - FTIR spectra of cured resin-ER-1 prior to and after thermal treatment at 180 °C for 4 h.

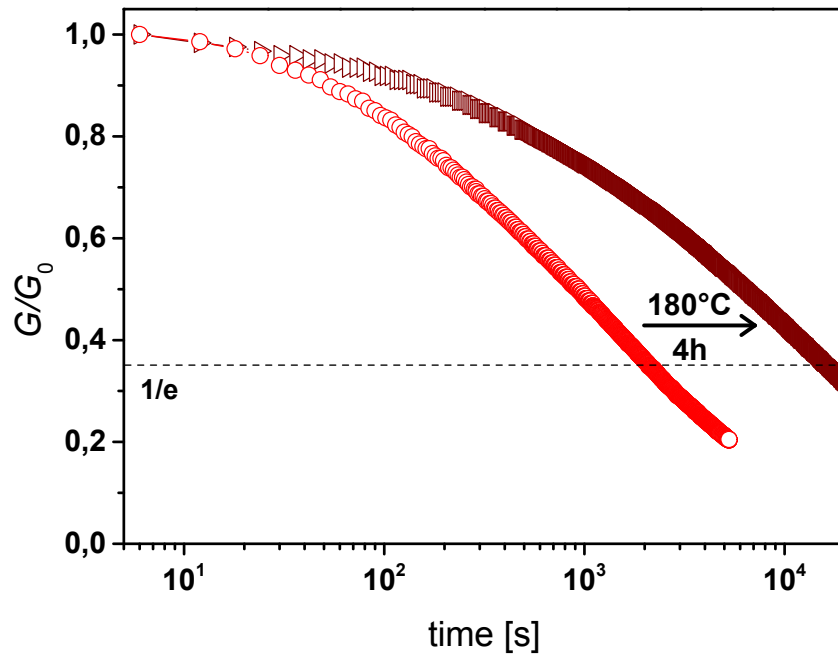

**Figure S6** - Normalised stress relaxation curves of DLP printed test specimen from catalyzed resin-ER-1, prior to and after thermal treatment of the samples at  $180^\circ\text{C}$  for 4 h. The stress relaxation experiments were carried out at  $180^\circ\text{C}$ .
